# Identification of four unconventional kinetoplastid kinetochore proteins KKT22–25 in *Trypanosoma brucei*

Olga O. Nerusheva, Patryk Ludzia, and Bungo Akiyoshi\*

Department of Biochemistry, University of Oxford, Oxford, OX1 3QU, UK

\*Correspondence: [bungo.akiyoshi@bioch.ox.ac.uk](mailto:bungo.akiyoshi@bioch.ox.ac.uk)

## Summary

The kinetochore is a multi-protein complex that drives chromosome segregation in eukaryotes. It assembles onto centromere DNA and interacts with spindle microtubules during mitosis and meiosis. Although most eukaryotes have canonical kinetochore proteins, kinetochores of evolutionarily divergent kinetoplastid species consist of at least 20 unconventional kinetochore proteins (KKT1–20). In addition, twelve proteins (KKIP1–12) are known to localize at kinetochore regions during mitosis. It remains unclear whether KKIP proteins interact with KKT proteins. Here, we report the identification of four additional kinetochore proteins, KKT22–25, in *Trypanosoma brucei*. KKT22 and KKT23 constitutively localize at kinetochores, while KKT24 and KKT25 localize from S phase to anaphase. KKT23 has a Gcn5-related N-acetyltransferase (GNAT) domain, which is not found in any kinetochore protein known to date. We also show that KKIP1 co-purifies with KKT proteins, but not with KKIP proteins. Finally, our affinity purification of KKIP2/3/4/6 identifies a number of proteins as their potential interaction partners, many of which are implicated in RNA binding or processing. These findings further support the idea that kinetoplastid kinetochores are unconventional.

Keywords: Kinetochore, Kinetoplastid, *Trypanosoma brucei*, centromere, GNAT

## 1. Introduction

Kinetoplastids are a group of unicellular flagellated eukaryotes found in diverse environmental conditions [1]. It has been proposed that kinetoplastids may represent one of the earliest-branching eukaryotes based on a number of unique molecular features [2]. Understanding their biology could therefore provide insights into the extent of conservation or divergence among eukaryotes and lead to a deeper understanding of biological systems. Importantly, three neglected tropical diseases are caused by parasitic kinetoplastids: African trypanosomiasis, Chagas disease, and leishmaniasis, caused by *Trypanosoma brucei*, *Trypanosoma cruzi*, and *Leishmania* spp, respectively [3]. Although recent advances in public health and combination therapy have decreased the effect of these diseases, new drugs and druggable pathways are still very much needed against these diseases [4]. To this end, a more thorough understanding of the unique underlying biological mechanisms of kinetoplastids is critical.

One of such fundamental processes is the transmission of genetic material from mother to daughter cells, which is crucial for the survival of all organisms. Chromosome segregation in eukaryotes is driven by the kinetochore, a macromolecular protein complex that assembles onto centromeric DNA and captures spindle microtubules during mitosis [5]. Its structural core is typically composed of DNA-binding and microtubule-binding modules [6]. At least a fraction of core kinetochore proteins are present in nearly all sequenced eukaryotes, implying that most eukaryotes use a largely conserved mechanism of DNA and microtubule binding [7–9]. However, none of canonical kinetochore proteins have been identified in the genome of kinetoplastids [10,11]. To identify their kinetochore components, we previously carried out a YFP-tagging screen and identified a protein that forms kinetochore-like dots [12]. Affinity purification of this protein identified co-purifying proteins whose localizations were subsequently examined by microscopy. This process was repeated until saturation, leading to the identification of 20 proteins that localize at kinetochores in *T. brucei*. Chromatin immunoprecipitation followed by deep sequencing confirmed that they are indeed kinetochore proteins, and we therefore named them KKT1–20 (kinetoplastid kinetochore proteins). Although these proteins are highly conserved among kinetoplastids, their apparent orthologs are absent in other eukaryotes, suggesting that kinetoplastids have an unconventional type of kinetochore proteins [12,13].

Recently, KKT-interacting protein 1 (KKIP1) was identified as a protein distantly related to Ndc80/Nuf2 microtubule-binding proteins based on weak similarity in the coiled-coil regions [14]. However, KKIP1 apparently lacks the calponin homology (CH) domain, a critical feature of Ndc80/Nuf2 proteins. KKIP1 therefore does not appear to be a genuine Ndc80/Nuf2 ortholog. Nonetheless, KKIP1 localizes at kinetochores and its depletion causes severe chromosome segregation defects [14]. Immunoprecipitation of KKIP1 from chemically-crosslinked cells led to the identification of six additional proteins (KKIP2–7) that localize to kinetochore regions during mitosis [14]. Very recently, immunoprecipitation of KKIP2–7 from non-crosslinked cells identified a 9-subunit protein complex called the KOK (kinetoplastid outer kinetochore) complex that consists of KKIP2, 3, 4, 6, 8, 9, 10, 11, and 12 [15]. KKT proteins were not detected in the immunoprecipitates of KKIP2–12 or KKIP1 without chemical crosslinking [15]. It therefore remains unclear whether KKIP1–12 interact with KKT proteins in native conditions.

A hallmark of kinetochores in most eukaryotes is the presence of specialized nucleosomes containing the centromere-specific histone H3 variant CENP-A, which epigenetically specifies the position of kinetochore assembly, forms the primary anchorage point to DNA, and recruits other kinetochore proteins [16]. However, CENP-A is absent in kinetoplastids. It therefore remains unknown how their kinetochores assemble specifically at centromeres. *T. brucei* has 11 large chromosomes that have regional centromeres of 20–120 kb in size, as well as ~100 small chromosomes that lack centromeres [17–19]. Although kinetochore assembly sites on large chromosomes are apparently determined in a sequence-independent manner, the underlying mechanism remains a mystery.

To understand how unconventional kinetoplastid kinetochores perform conserved functions such as kinetochore specification, it is critical to have a complete constituent list. In this study, we report the identification of four additional kinetochore proteins in *T. brucei*.

## **2. Results**

### **2.1 Identification of KKT22 and KKT23 in *Trypanosoma brucei***

Our previous immunoprecipitation of KKT3 that was N-terminally tagged with YFP (YFP-KKT3) did not result in co-purification of other kinetochore proteins [12]. To verify this result, we made a strain

that had a C-terminally YFP-tagged KKT3 (KKT3-YFP) as the sole copy of KKT3, and performed its immunoprecipitation using the same protocol. We detected a number of kinetochore proteins by mass spectrometry (Figure 1a and Table S1), suggesting that YFP-KKT3 was not fully functional. In addition to known kinetochore proteins, there were two uncharacterized proteins (ORF Tb927.9.6420 and Tb927.10.6600) that co-purified with KKT3-YFP in an apparently specific manner (Figure 1a). We tagged these proteins with an N-terminal YFP at the endogenous locus and found that they localized at kinetochores throughout the cell cycle (Figure 1b and 1c). Immunoprecipitation of these proteins showed that they specifically co-purified with other KKT proteins (Figure 1d and 1e). We therefore named them KKT22 and KKT23. These proteins were not detected in the immunoprecipitates of any other kinetochore protein [12], so it is likely that these proteins are closely associated with KKT3.

Homology search of KKT22 identified apparent orthologs in several kinetoplastids (Table 1), but not in *Bodo saltans* (a free-living kinetoplastid) or other eukaryotes. A profile-profile comparison using HHpred [20] did not reveal any obvious domain, except for a possible zinc hook motif of Rad50 (Figure S1). KKT23 has a Gcn5-related N-acetyltransferase (GNAT) domain [21–23], which is not found in any known kinetochore protein in other eukaryotes. In humans, TIP60 and KAT7/HBO1/MYST2 acetyltransferases (both are members of the MYST subfamily) are known to regulate kinetochore functions but are not part of core kinetochores [24,25]. We found that KKT23 co-purified with many KKT proteins (Figure 1e), implying that it is a core kinetochore protein in *T. brucei*. Interestingly, our sequence analysis failed to identify an obvious orthologous relationship with known GNAT subfamily members, suggesting that KKT23 forms a distinct subfamily. Our finding that an apparent ortholog of KKT23 is found even in divergent kinetoplastids (*Bodo saltans* and *Perkinsela*) (Table 1 and Figure S2) raises a possibility that it plays a fundamental role at the kinetoplastid kinetochore, which warrants further investigation.

## 2.2 Identification of KKT24

In our purification of YFP-KKT22, there was another kinetochore protein candidate (ORF Tb927.10.4200) (Figure 1d). We found that this protein in fact localized at kinetochores from S phase to anaphase (Figure 2a) and its immunoprecipitation confirmed specific co-purification with other

kinetochore proteins (Figure 2b). We therefore named it KKT24. Interestingly, KKT24 and KKIP1 share several similarities. Both proteins are predicted to consist mostly of coiled coils (Figure S3) [14], and their N-termini are located at the outer region of kinetochores, as judged by the formation of pairs of dots in metaphase (Figure 2b) [15,26]. However, our immunoprecipitation data do not support a possibility that KKT24 and KKIP1 form a stable complex (Figure 2b and see below). We also note that obvious orthologs for KKT24 and KKIP1 are not found in free-living *Bodo saltans*, an organism that has essentially all of KKT1–20 proteins (Table 1) [12,13].

### **2.3 Identification of KKT25**

Our purification of KKT24 led to the identification of another kinetochore protein candidate (ORF Tb927.8.2830) (Figure 2b), which indeed localized at kinetochores from S phase to anaphase (Figure 3a). We confirmed that this protein co-purified with various kinetochore proteins (Figure 3b) and therefore named it KKT25. Like KKT22 and KKT24, it is conserved in many kinetoplastids, but not in *Bodo saltans* or other eukaryotes (Table 1 and Figure S4). We failed to identify any obvious domain or predicted coiled coils in KKT25.

### **2.4 KKIP1 co-purifies with KKT proteins, not with KKIP proteins**

A previous study by D'Archivio and Wickstead identified a putative kinetochore protein KKIP1 that localized to kinetochores [14]. Its immunoprecipitation from chemically-crosslinked trypanosome cells led to co-purification of many nuclear proteins including KKT proteins and KKIP2–7 [14]. However, KKT proteins were not detected in the KKIP1 immunoprecipitate without crosslinking [15], so the relationship between KKIP1 and KKT proteins remained unclear. While re-searching our previous mass spectrometry data [12] against the latest *T. brucei* proteome database, we found that KKIP1 was actually present in the immunoprecipitate of KKT2 (Figure 4a). We had therefore named it KKT21 but switched to use the name KKIP1 following the publication of the D'Archivio and Wickstead paper. Immunoprecipitation of KKIP1 using our protocol revealed co-purification with a number of KKT proteins (Figure 4b), showing that KKIP1 is a genuine kinetochore protein. It is important to mention that we did not detect KKIP2–7 in our KKIP1 immunoprecipitation sample. This raises a possibility

that previous identification of KKIP2–7 in the immunoprecipitate of KKIP1 from crosslinked cells was due to the artificial chemical crosslinking, which is consistent with the identification of many nuclear proteins in the same sample [14].

## **2.5 KOK subunits co-purify with a number of proteins with RNA-related functions**

Immunoprecipitation of KKIP2–7 from non-crosslinked cells identified a complex called the KOK (kinetoplastid outer kinetochore) complex that consists of 9 KKIP proteins (KKIP2, 3, 4, 6, 8, 9, 10, 11, 12) and localizes at the outer region of kinetochores during mitosis [15]. It has been proposed that KKIP1 provides a linkage between inner kinetochores and the KOK complex, despite the fact that KKIP1 was not detected in the immunoprecipitates of any KOK components [15]. To reveal the relationship between the KOK complex and KKT proteins, we performed immunoprecipitation of KKIP2–7 using our purification protocol. Immunoprecipitation of KKIP7 did not reveal any specific interacting proteins (Table S1), while that of KKIP5 was unsuccessful despite multiple attempts (Table S1 and data not shown). In contrast, immunoprecipitation of KKIP2, KKIP3, KKIP4, and KKIP6 revealed a number of co-purifying proteins, including the KOK components (Figure 5a-d). Besides Tb927.3.3740 and Tb927.2.3160/Gar1 which were detected in the previous report [15], ten additional proteins were identified as apparent interactors of KKIP2/3/4/6, many of which have putative domains implicated in RNA binding, transcription, or splicing (Figure 5e). Interestingly, our HHpred analysis also revealed a similarity to CTD kinase subunit in KKIP6 as well as a putative RNA recognition motif (RRM) in KKIP4, KKIP9, and KKIP10 (Figure 5e). The functional significance of these factors for kinetochore functions, if any, remains to be determined. Although we did not detect significant amounts of KOK components in our immunoprecipitates of KKT proteins or KKIP1, several kinetochore proteins were detected in the immunoprecipitates of KOK components, especially KKIP3 (Figure 5b). Because KKIP1 did not co-purify with any KOK components using the same purification protocol (Figure 4b), kinetochore localization of the KOK complex may be mediated by KKIP3, rather than KKIP1.

### 3. Discussion

In this study, we identified four additional kinetochore components in *T. brucei* (KKT22–25). We also confirmed that KKIP1 is a genuine kinetochore protein. It is possible that KKIP5 is also a kinetochore protein based on its presence in the immunoprecipitates of KKT24 and KKT25 (Figure 2b and 3b) as well as observed chromosome segregation defects upon depletion of KKIP5 [27]. Our original definition of genuine kinetochore proteins in *T. brucei* was that any such protein should co-purify “only” with other kinetochore proteins (except for KKT4 and KKT20 that also co-purify with APC/C subunits) [12,13]. According to this definition, components of the KOK complex are not genuine kinetochore proteins because they co-purify with a number of factors that are implicated in RNA binding or processing. However, it has been clearly shown that KOK components localize at outer kinetochore regions at least during metaphase [14,15]. More importantly, our immunoprecipitation of KKIP3 revealed co-purification with several KKT proteins, suggesting that the KOK complex indeed localizes at kinetochores. Defects in chromosome segregation have not been reported after knock-down of KOK components or its interaction partners [15]. We speculate that the KOK complex might be involved in the segregation of small chromosomes, rather than large chromosomes, in *T. brucei*.

Identification of a kinetochore protein that has a GNAT domain reinforces the idea that kinetoplastid kinetochores are unconventional. It will be important to test whether the GNAT domain of KKT23 is important for kinetochore functions. Acetylation of unknown substrates (possibly histones or kinetochore proteins) at centromeres might mark the position of kinetochore assembly sites in kinetoplastids that lack CENP-A. It is noteworthy that the genome-wide tagging project in *T. brucei* has come to an end, which did not identify any additional kinetochore components [28,29]. It is possible that we now have a complete list of kinetochore components, which include KKT1–20, KKIP1, KKIP5, and KKT22–25. Characterization of their functions and structures is not only important for our better understanding of eukaryotic chromosome segregation machinery but also for the development of new drugs against kinetoplastid diseases.

## 4. Materials and methods

### 4.1. Cells

All cell lines, plasmids, and primers/synthetic DNA used in this study are listed in Table S2, S3, and S4, respectively. All cell lines used in this study were derived from *Trypanosoma brucei* SmOxP927 procyclic form cells (TREU 927/4 expressing T7 RNA polymerase and the tetracycline repressor to allow inducible expression) [30]. Cells were grown at 28 °C in SDM-79 medium supplemented with 10% (v/v) heat-inactivated fetal calf serum [31]. The cell line carrying KKT3-YFP as the sole copy of KKT3 was made by deleting one allele of KKT3 by a fusion PCR method [32] using a neomycin gene cassette from pBA183, followed by tagging of the remaining allele with a C-terminal YFP using a PCR-based method with a blasticidin selection marker [33]. N-terminally YFP-tagged KKT22 was made by a PCR-based method using pPOTv7 (eYFP, blasticidin) [33]. Endogenous YFP tagging for KKT23–25 and KKIP1–7 was performed using the pEnT5-Y vector [34] with PCR products or synthesized DNA fragments using XbaI/BamHI sites. Endogenous tdTomato tagging of KKT2 was performed using pBA164 that has a blasticidin selection marker [13] or pBA809 that has a neomycin marker. pBA809 was made by subcloning of the KKT2 targeting fragment from pBA67 [12] into pEnT6-tdTomato [34] using XbaI/BamHI sites. All constructs were sequence verified. Plasmids linearized by NotI were transfected to trypanosomes by electroporation into an endogenous locus. Transfected cells were selected by addition of 25 µg/ml hygromycin (pEnT5-Y derivatives), 10 µg/ml blasticidin (pBA164 or pPOTv7-based PCR products), or 30 µg/ml G418 (pBA809 or pBA183-based PCR products).

### 4.2. Fluorescence microscopy

Cells were fixed with 4% paraformaldehyde for 5 min and images were captured at room temperature on a DeltaVision fluorescence microscope (Applied Precision) installed with softWoRx version 5.5 housed in the Micron Oxford essentially as described [13]. Images were processed in ImageJ [35]. Figures were made using Inkscape (The Inkscape Team) and converted to EPS or PDF format.

### 4.3. Immunoprecipitation and mass spectrometry



Immunoprecipitation was performed as previously described using mouse monoclonal anti-GFP antibodies (Roche, 11814460001) that had been pre-conjugated with Protein-G magnetic beads (Thermo Fisher Scientific, 10004D) with dimethyl pimelimidate (Sigma, D8388) [12]. Mass spectrometry was also performed essentially as previously described using a Q Exactive (Thermo Scientific) at the Advanced Proteomics Facility, University of Oxford [12]. Peptides were identified by Mascot (Matrix Science) using a custom *T. brucei* proteome database. Proteins identified with at least two peptides were considered as significant and shown in Table S1.

#### 4.4. Bioinformatics

Search for homologous proteins were done using BLAST in the TriTryp database [36,37], Jackhmmer on the UniProtKB proteome database using a default setting (HmmerWeb version 2.39 [38]), or hmmsearch on select proteomes using manually prepared hmm profiles (HMMER version 3.0 [39]). A protein with the best score in a given species was considered as a putative ortholog if a reciprocal search using BLAST or Jackhmmer identified the starting query protein as the best hit in the original species. HHpred was carried out using pfamA\_v32.0 and PDB\_mmCIF70 databases [20]. Multiple sequence alignment was performed with MAFFT (L-INS-i method, version 7) [40] and visualized with the Clustalx coloring scheme in Jalview (version 2.10) [41]. Coiled coils were predicted using COILS [42]. Accession numbers for protein sequences were retrieved from TriTryp database [11,37,43–47] or UniProt [48].

#### Supplementary information

A supplementary Excel file has all the lists of identified proteins by mass spectrometry (Table S1). A supplementary PDF file has 4 figures, as well as details of cell lines (Table S2), plasmids (Table S3), and primers or synthetic DNA sequences (Table S4) used in this study.

**Author's contributions.** OON performed immunoprecipitation of KKT3 and KKIP1–7 and identified KKT22 and KKT23. BA performed immunoprecipitation of KKT22, KKT23, KKT25 and identified KKT24. PL performed immunoprecipitation of KKT24 and identified KKT25. All authors participated

in data analysis. BA wrote the manuscript. All authors gave final approval for publication and agreed to be held accountable for the work performed therein.

**Competing interests.** We declare we have no competing interests.

**Funding.** PL was supported by Boehringer Ingelheim Fonds. BA was supported by a Wellcome Trust Senior Research Fellowship (grant no. 210622/Z/18/Z) and the European Molecular Biology Organization Young Investigator Program.

### **Acknowledgements.**

We thank Midori Ishii for comments on the manuscript and the Advanced Proteomics Facility, especially Svenja Hester and Sabrina Liberatori, for mass spectrometry analysis, as well as Micron Oxford. We also thank Samuel Dean for providing pPOT plasmids.

### **References**

1. d'Avila-Levy CM *et al.* 2015 Exploring the environmental diversity of kinetoplastid flagellates in the high-throughput DNA sequencing era. *Mem. Inst. Oswaldo Cruz* **110**, 956–965. (doi:10.1590/0074-02760150253)
2. Cavalier-Smith T. 2010 Kingdoms Protozoa and Chromista and the eozoan root of the eukaryotic tree. *Biol. Lett.* **6**, 342–345. (doi:10.1098/rsbl.2009.0948)
3. Stuart K, Brun R, Croft S, Fairlamb A, Gürtler RE, McKerrow J, Reed S, Tarleton R. 2008 Kinetoplastids: related protozoan pathogens, different diseases. *J. Clin. Invest.* **118**, 1301–1310. (doi:10.1172/JCI33945)
4. Field MC *et al.* 2017 Anti-trypanosomatid drug discovery: an ongoing challenge and a continuing need. *Nat. Rev. Microbiol.* **15**, 447. (doi:10.1038/nrmicro.2017.69)
5. McIntosh JR. 2016 Mitosis. *Cold Spring Harb Perspect Biol* **8**. (doi:10.1101/cshperspect.a023218)
6. Musacchio A, Desai A. 2017 A Molecular View of Kinetochore Assembly and Function. *Biology (Basel)* **6**. (doi:10.3390/biology6010005)
7. Meraldi P, McAinsh AD, Rheinbay E, Sorger PK. 2006 Phylogenetic and structural analysis of centromeric DNA and kinetochore proteins. *Genome Biol.* **7**, R23. (doi:10.1186/gb-2006-7-3-r23)
8. Drinnenberg IA, Akiyoshi B. 2017 Evolutionary Lessons from Species with Unique Kinetochores. *Prog. Mol. Subcell. Biol.* **56**, 111–138. (doi:10.1007/978-3-319-58592-5\_5)

9. van Hooff JJ, Tromer E, van Wijk LM, Snel B, Kops GJ. 2017 Evolutionary dynamics of the kinetochore network in eukaryotes as revealed by comparative genomics. *EMBO Rep.* **18**, 1559–1571. (doi:10.15252/embr.201744102)
10. Lowell JE, Cross GAM. 2004 A variant histone H3 is enriched at telomeres in *Trypanosoma brucei*. *J. Cell. Sci.* **117**, 5937–5947. (doi:10.1242/jcs.01515)
11. Berriman M *et al.* 2005 The genome of the African trypanosome *Trypanosoma brucei*. *Science* **309**, 416–422. (doi:10.1126/science.1112642)
12. Akiyoshi B, Gull K. 2014 Discovery of unconventional kinetochores in kinetoplastids. *Cell* **156**, 1247–1258. (doi:10.1016/j.cell.2014.01.049)
13. Nerusheva OO, Akiyoshi B. 2016 Divergent polo box domains underpin the unique kinetoplastid kinetochore. *Open Biol* **6**, 150206. (doi:10.1098/rsob.150206)
14. D'Archivio S, Wickstead B. 2017 Trypanosome outer kinetochore proteins suggest conservation of chromosome segregation machinery across eukaryotes. *J. Cell Biol.* **216**, 379–391. (doi:10.1083/jcb.201608043)
15. Brusini L, D'Archivio S, McDonald J, Wickstead B. 2019 Ndc80/Nuf2-like protein KKIPI connects a stable kinetoplastid outer kinetochore complex to the inner kinetochore and responds to metaphase tension. *bioRxiv*, 764829. (doi:10.1101/764829)
16. Black BE, Cleveland DW. 2011 Epigenetic centromere propagation and the nature of CENP-A nucleosomes. *Cell* **144**, 471–479. (doi:10.1016/j.cell.2011.02.002)
17. Wickstead B, Ersfeld K, Gull K. 2004 The small chromosomes of *Trypanosoma brucei* involved in antigenic variation are constructed around repetitive palindromes. *Genome Res.* **14**, 1014–1024. (doi:10.1101/gr.2227704)
18. Obado SO, Bot C, Nilsson D, Andersson B, Kelly JM. 2007 Repetitive DNA is associated with centromeric domains in *Trypanosoma brucei* but not *Trypanosoma cruzi*. *Genome Biol.* **8**, R37. (doi:10.1186/gb-2007-8-3-r37)
19. Echeverry MC, Bot C, Obado SO, Taylor MC, Kelly JM. 2012 Centromere-associated repeat arrays on *Trypanosoma brucei* chromosomes are much more extensive than predicted. *BMC Genomics* **13**, 29. (doi:10.1186/1471-2164-13-29)
20. Zimmermann L *et al.* 2018 A Completely Reimplemented MPI Bioinformatics Toolkit with a New HHpred Server at its Core. *J. Mol. Biol.* **430**, 2237–2243. (doi:10.1016/j.jmb.2017.12.007)
21. Dyda F, Klein DC, Hickman AB. 2000 GCN5-related N-acetyltransferases: a structural overview. *Annu Rev Biophys Biomol Struct* **29**, 81–103. (doi:10.1146/annurev.biophys.29.1.81)
22. Roth SY, Denu JM, Allis CD. 2001 Histone acetyltransferases. *Annu. Rev. Biochem.* **70**, 81–120. (doi:10.1146/annurev.biochem.70.1.81)
23. Salah Ud-Din AIM, Tikhomirova A, Roujeinikova A. 2016 Structure and Functional Diversity of GCN5-Related N-Acetyltransferases (GNAT). *Int J Mol Sci* **17**. (doi:10.3390/ijms17071018)
24. Mo F *et al.* 2016 Acetylation of Aurora B by TIP60 ensures accurate chromosomal segregation. *Nat. Chem. Biol.* **12**, 226–232. (doi:10.1038/nchembio.2017)

25. Ohzeki J-I *et al.* 2016 KAT7/HBO1/MYST2 Regulates CENP-A Chromatin Assembly by Antagonizing Suv39h1-Mediated Centromere Inactivation. *Dev. Cell* **37**, 413–427. (doi:10.1016/j.devcel.2016.05.006)
26. Llauro A, Hayashi H, Bailey ME, Wilson A, Ludzia P, Asbury CL, Akiyoshi B. 2018 The kinetoplastid kinetochore protein KKT4 is an unconventional microtubule tip-coupling protein. *J. Cell Biol.* **217**, 3886–3900. (doi:10.1083/jcb.201711181)
27. Zhou Q, Pham KTM, Hu H, Kurasawa Y, Li Z. 2019 A kinetochore-based ATM/ATR-independent DNA damage checkpoint maintains genomic integrity in trypanosomes. *Nucleic Acids Res.* **47**, 7973–7988. (doi:10.1093/nar/gkz476)
28. Dean S, Sunter JD, Wheeler RJ. 2017 TrypTag.org: A Trypanosome Genome-wide Protein Localisation Resource. *Trends Parasitol.* **33**, 80–82. (doi:10.1016/j.pt.2016.10.009)
29. Halliday C, Billington K, Wang Z, Madden R, Dean S, Sunter JD, Wheeler RJ. 2019 Cellular landmarks of *Trypanosoma brucei* and *Leishmania mexicana*. *Mol. Biochem. Parasitol.* **230**, 24–36. (doi:10.1016/j.molbiopara.2018.12.003)
30. Poon SK, Peacock L, Gibson W, Gull K, Kelly S. 2012 A modular and optimized single marker system for generating *Trypanosoma brucei* cell lines expressing T7 RNA polymerase and the tetracycline repressor. *Open Biol* **2**, 110037. (doi:10.1098/rsob.110037)
31. Brun R, Schönenberger. 1979 Cultivation and in vitro cloning or procyclic culture forms of *Trypanosoma brucei* in a semi-defined medium. Short communication. *Acta Trop.* **36**, 289–292.
32. Merritt C, Stuart K. 2013 Identification of essential and non-essential protein kinases by a fusion PCR method for efficient production of transgenic *Trypanosoma brucei*. *Mol. Biochem. Parasitol.* **190**, 44–49. (doi:10.1016/j.molbiopara.2013.05.002)
33. Dean S, Sunter J, Wheeler RJ, Hodgkinson I, Gluenz E, Gull K. 2015 A toolkit enabling efficient, scalable and reproducible gene tagging in trypanosomatids. *Open Biol* **5**, 140197. (doi:10.1098/rsob.140197)
34. Kelly S *et al.* 2007 Functional genomics in *Trypanosoma brucei*: a collection of vectors for the expression of tagged proteins from endogenous and ectopic gene loci. *Mol. Biochem. Parasitol.* **154**, 103–109. (doi:10.1016/j.molbiopara.2007.03.012)
35. Schneider CA, Rasband WS, Eliceiri KW. 2012 NIH Image to ImageJ: 25 years of image analysis. *Nat. Methods* **9**, 671–675.
36. Altschul SF, Madden TL, Schäffer AA, Zhang J, Zhang Z, Miller W, Lipman DJ. 1997 Gapped BLAST and PSI-BLAST: a new generation of protein database search programs. *Nucleic Acids Res.* **25**, 3389–3402.
37. Aslett M *et al.* 2010 TriTrypDB: a functional genomic resource for the Trypanosomatidae. *Nucleic Acids Res.* **38**, D457–462. (doi:10.1093/nar/gkp851)
38. Potter SC, Luciani A, Eddy SR, Park Y, Lopez R, Finn RD. 2018 HMMER web server: 2018 update. *Nucleic Acids Res.* **46**, W200–W204. (doi:10.1093/nar/gky448)
39. Eddy SR. 1998 Profile hidden Markov models. *Bioinformatics* **14**, 755–763.

40. Katoh K, Standley DM. 2013 MAFFT multiple sequence alignment software version 7: improvements in performance and usability. *Mol. Biol. Evol.* **30**, 772–780. (doi:10.1093/molbev/mst010)
41. Waterhouse AM, Procter JB, Martin DMA, Clamp M, Barton GJ. 2009 Jalview Version 2--a multiple sequence alignment editor and analysis workbench. *Bioinformatics* **25**, 1189–1191. (doi:10.1093/bioinformatics/btp033)
42. Lupas A, Van Dyke M, Stock J. 1991 Predicting coiled coils from protein sequences. *Science* **252**, 1162–1164. (doi:10.1126/science.252.5009.1162)
43. El-Sayed NM *et al.* 2005 The genome sequence of *Trypanosoma cruzi*, etiologic agent of Chagas disease. *Science* **309**, 409–415. (doi:10.1126/science.1112631)
44. Ivens AC *et al.* 2005 The genome of the kinetoplastid parasite, *Leishmania major*. *Science* **309**, 436–442. (doi:10.1126/science.1112680)
45. Kraeva N *et al.* 2015 *Leptomonas seymouri*: Adaptations to the Dixenous Life Cycle Analyzed by Genome Sequencing, Transcriptome Profiling and Co-infection with *Leishmania donovani*. *PLoS Pathog.* **11**, e1005127. (doi:10.1371/journal.ppat.1005127)
46. Jackson AP *et al.* 2016 Kinetoplastid Phylogenomics Reveals the Evolutionary Innovations Associated with the Origins of Parasitism. *Curr. Biol.* (doi:10.1016/j.cub.2015.11.055)
47. Tanifuji G *et al.* 2017 Genome sequencing reveals metabolic and cellular interdependence in an amoeba-kinetoplastid symbiosis. *Sci Rep* **7**, 11688. (doi:10.1038/s41598-017-11866-x)
48. UniProt Consortium. 2019 UniProt: a worldwide hub of protein knowledge. *Nucleic Acids Res.* **47**, D506–D515. (doi:10.1093/nar/gky1049)

## Figure legends

### Figure 1. Identification of KKT22 and KKT23

(a) KKT3-YFP co-purifies with a number of KKT proteins, including two kinetochore protein candidates, KKT22 and KKT23. See Table S1 for all proteins identified by mass spectrometry. Cell line, BAP1123.

(b) YFP-KKT22 and (c) YFP-KKT23 localize at kinetochores throughout the cell cycle. K and N represent the kinetoplast (mitochondrial DNA) and nucleus, respectively. These organelles have distinct replication and segregation timings and serve as good cell-cycle markers. K\* is an elongated kinetoplast and indicates that the nucleus is in S phase. Bars, 5  $\mu$ m. BAP1454 and BAP1593.

(d) KKT22 co-purifies with KKT proteins and another kinetochore protein candidate, KKT24. BAP1490.

(e) KKT23 co-purifies with KKT proteins. BAP1549.

### Figure 2. Identification of KKT24

(a) KKT24 localizes at kinetochores from S phase to anaphase. Note that YFP-KKT24 signals appear as pairs of dots (indicated by \*). Bar, 5  $\mu$ m. Cell line, BAP1819.

(b) KKT24 co-purifies with a number of KKT proteins, KKIP5, and another kinetochore protein candidate, KKT25. BAP1635.

### Figure 3. Identification of KKT25

(a) YFP-KKT25 localizes at kinetochores S phase to anaphase. Bar, 5  $\mu$ m. Cell line, BAP1820.

(b) KKT25 co-purifies with a number of KKT proteins and KKIP5. BAP1742.

### Figure 4. KKIP1 co-purifies with KKT proteins, not with KKIP proteins

(a) Re-analysis of our previous mass spectrometry data [12] identifies KKIP1 in the KKT2 immunoprecipitate.

(b) YFP-KKIP1 co-purifies with a number of KKT proteins but none of other KKIP proteins. Cell line, BAP710.

### Figure 5. KOK subunits co-purify with a number of proteins with RNA-related functions

(a-d) Mass spectrometry summary tables of KKIP2, KKIP3, KKIP4 and KKIP6 immunoprecipitates.

Cell lines, BAP825, BAP826, BAP808, BAP828.

(e) Putative domains in the identified proteins and KOK subunits.

**Table 1. Conservation of KKT22–25, KKIP1, and KKIP5 among kinetoplastids**

|                        | KKT22              | KKT23              | KKT24              | KKT25              | KKIP1              | KKIP5              |
|------------------------|--------------------|--------------------|--------------------|--------------------|--------------------|--------------------|
| <i>T. brucei</i>       | Tb927.9.6420       | Tb927.10.6600      | Tb927.10.4200      | Tb927.8.2830       | Tb927.5.4520       | Tb927.7.6630       |
| <i>T. congolense</i>   |                    | TcIL3000_10_5670   | TcIL3000_10_3510   | TcIL3000_0_41350   | TcIL3000_5_5210    | TcIL3000_0_33690   |
| <i>T. grayi</i>        | DQ04_05731010      | DQ04_07341010      | DQ04_12781000      | DQ04_02041070      | DQ04_01751000      | DQ04_10231010      |
| <i>T. vivax</i>        |                    | TvY486_1006570     | TvY486_0019400     | TvY486_0802340     | TvY486_0503940     | TvY486_0706450     |
| <i>T. cruzi</i>        | TeCLB.506509.60    | TeCLB.510187.340   | TeCLB.511467.50    | TeCLB.504427.170   | TeCLB.509539.40    | TeCLB.510055.70    |
| <i>T. rangeli</i>      | TRSC58_06150       |                    | TraAM80_06991      | TRSC58_01409       | TRSC58_03083       | TRSC58_00449       |
| <i>T. theileri</i>     | TM35_000182020     | TM35_000022840     | TM35_000421720     | TM35_000132550     | TM35_000061590     | TM35_000202190     |
| <i>Blechnomonas</i>    | Baya_113_0090      | Baya_001_0150      | Baya_039_0490      | Baya_024_0050      | Baya_086_0290      | Baya_072_0080      |
| <i>Crithidia</i>       |                    | CFAC1_250031900    | CFAC1_240027400    | CFAC1_150014500    | CFAC1_020006200    | CFAC1_090010600    |
| <i>Leptomonas</i>      |                    | Lsey_0046_0080     | Lsey_0122_0130     | Lsey_0053_0040     | Lsey_0120_0220     | Lsey_0154_0070     |
| <i>Endotrypanum</i>    |                    | EMOLV88_360026200  | EMOLV88_350006300  | EMOLV88_230010500  | EMOLV88_050005000  | EMOLV88_170008400  |
| <i>L. mexicana</i>     | LmxM.15.0825       | LmxM.36.2100       | LmxM.34.0180       | LmxM.23.1610       | LmxM.05.0010       | LmxM.17.0430       |
| <i>Phytomonas</i>      | GSEM1_T00007051001 | GSEM1_T00000676001 | GSEM1_T00004838001 | GSEM1_T00006110001 | GSEM1_T00003924001 | GSEM1_T00002551001 |
| <i>Paratrypanosoma</i> | PCON_0021420       | PCON_0016010       | PCON_0019770       | PCON_0076260       | PCON_0068010       |                    |
| <i>Bodo saltans</i>    |                    | BSAL_82255         |                    |                    |                    |                    |
| <i>Perkinsela</i>      |                    | XU18_2502          |                    |                    |                    |                    |

(a)

| Proteins co-purified with KKT3-YFP | Mascot score | Number of peptides | Coverage |
|------------------------------------|--------------|--------------------|----------|
| KKT3                               | 4112         | 194                | 49.6%    |
| KKT2                               | 1096         | 39                 | 35.9%    |
| KKT7                               | 961          | 43                 | 52.0%    |
| KKT1                               | 788          | 32                 | 19.9%    |
| KKT8                               | 395          | 12                 | 37.3%    |
| KKT9                               | 208          | 8                  | 24.3%    |
| KKT10                              | 188          | 7                  | 18.9%    |
| KKT6                               | 175          | 13                 | 33.7%    |
| KKT4                               | 133          | 6                  | 21.2%    |
| KKT19                              | 132          | 6                  | 20.5%    |
| KKT14                              | 127          | 4                  | 14.2%    |
| <b>Tb927.9.6420 (KKT22)</b>        | 119          | 6                  | 33.9%    |
| <b>Tb927.10.6600 (KKT23)</b>       | 105          | 7                  | 33.3%    |
| KKT11                              | 101          | 4                  | 21.9%    |

(b)

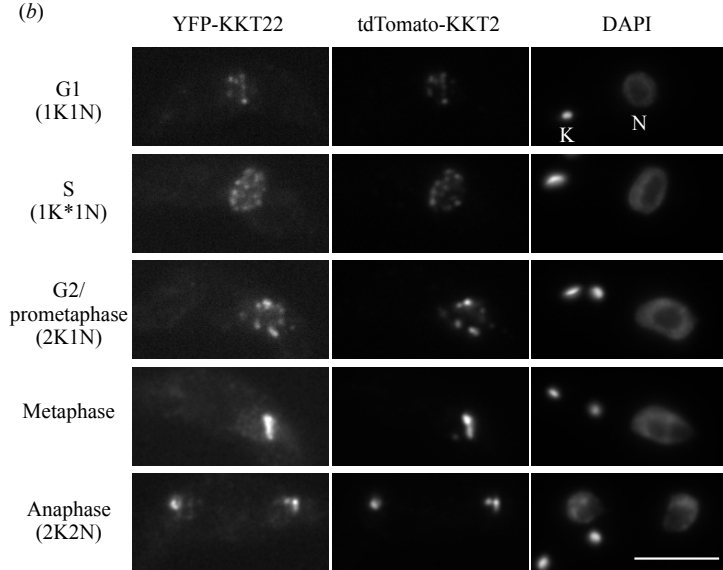

(c)

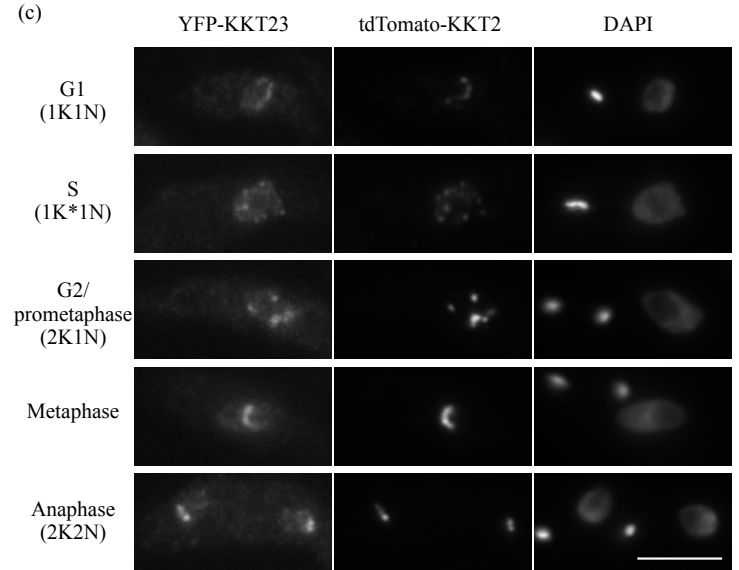

(d)

| Proteins co-purified with YFP-KKT22 | Mascot score | Number of peptides | Coverage |
|-------------------------------------|--------------|--------------------|----------|
| KKT3                                | 9597         | 426                | 38.2%    |
| KKT7                                | 7351         | 273                | 49.1%    |
| KKT1                                | 4377         | 124                | 15.0%    |
| KKT8                                | 3940         | 103                | 34.8%    |
| KKT2                                | 3553         | 104                | 22.1%    |
| KKT4                                | 1595         | 40                 | 19.8%    |
| KKT6                                | 1489         | 42                 | 25.9%    |
| KKT23                               | 1045         | 38                 | 7.8%     |
| KKT10                               | 999          | 46                 | 16.8%    |
| KKT14                               | 815          | 39                 | 16.2%    |
| KKT5                                | 640          | 23                 | 15.4%    |
| KKT9                                | 579          | 35                 | 32.2%    |
| KKT19                               | 533          | 26                 | 22.1%    |
| KKT12                               | 394          | 11                 | 15.0%    |
| <b>Tb927.10.4200 (KKT24)</b>        | 178          | 11                 | 6.0%     |
| KKT22                               | 85           | 10                 | 15.8%    |

(e)

| Proteins co-purified with YFP-KKT23 | Mascot score | Number of peptides | Coverage |
|-------------------------------------|--------------|--------------------|----------|
| KKT3                                | 5560         | 258                | 39.3%    |
| KKT7                                | 1775         | 62                 | 37.9%    |
| KKT22                               | 1480         | 67                 | 45.1%    |
| KKT1                                | 897          | 30                 | 16.3%    |
| KKT8                                | 864          | 24                 | 41.9%    |
| KKT2                                | 756          | 21                 | 15.6%    |
| KKT4                                | 708          | 13                 | 15.8%    |
| KKT6                                | 386          | 9                  | 30.7%    |
| KKT23                               | 345          | 12                 | 37.4%    |
| KKT9                                | 329          | 16                 | 31.3%    |
| KKT19                               | 295          | 8                  | 32.6%    |
| KKT14                               | 207          | 6                  | 20.7%    |
| KKT10                               | 201          | 7                  | 15.7%    |
| KKT5                                | 201          | 5                  | 21.1%    |
| KKT11                               | 101          | 3                  | 12.0%    |
| KKT12                               | 95           | 2                  | 14.5%    |

**Figure 1. Identification of KKT22 and KKT23**



(a)

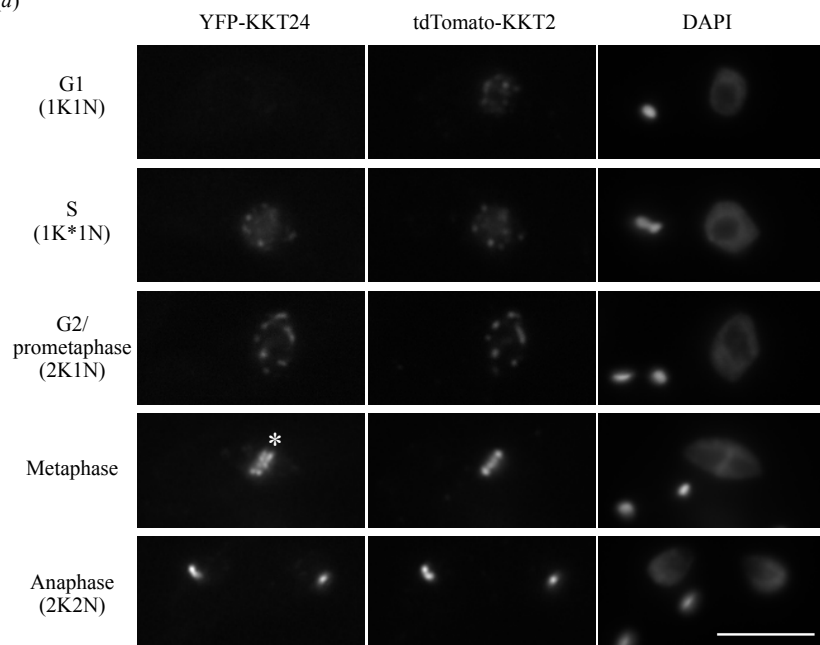

(b)

| Proteins co-purified with YFP-KKT24 | Mascot score | Number of peptides | Coverage |
|-------------------------------------|--------------|--------------------|----------|
| KKT7                                | 4400         | 153                | 69.3%    |
| KKT24                               | 4191         | 126                | 60.2%    |
| KKT1                                | 3024         | 106                | 27.5%    |
| KKT2                                | 2735         | 88                 | 38.7%    |
| KKT9                                | 2495         | 88                 | 78.4%    |
| KKT8                                | 1913         | 52                 | 73.2%    |
| KKT4                                | 1556         | 33                 | 46.8%    |
| KKT14                               | 1098         | 29                 | 31.5%    |
| KKT10                               | 908          | 40                 | 37.2%    |
| KKT19                               | 724          | 34                 | 36.0%    |
| KKT11                               | 688          | 24                 | 49.0%    |
| <b>Tb927.8.2830 (KKT25)</b>         | 684          | 32                 | 42.2%    |
| KKT6                                | 565          | 20                 | 45.4%    |
| KKT5                                | 481          | 19                 | 34.2%    |
| KKIP5                               | 377          | 7                  | 16.9%    |
| KKT3                                | 302          | 12                 | 17.6%    |

**Figure 2. Identification of KKT24**

(a)

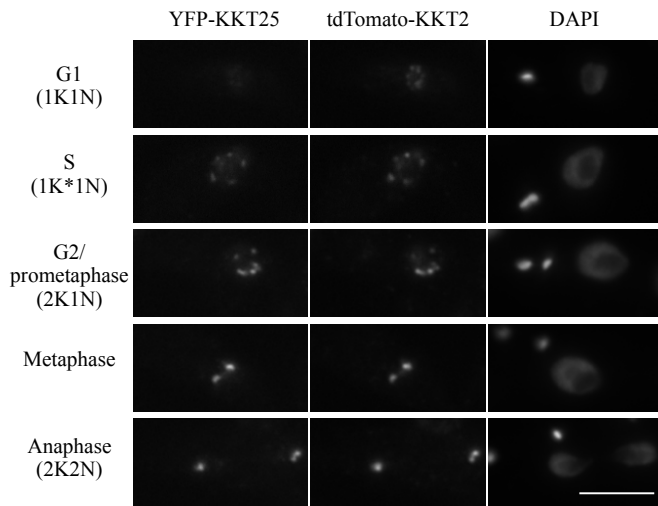

(b)

| Proteins co-purified with YFP-KKT25 | Mascot score | Number of peptides | Coverage |
|-------------------------------------|--------------|--------------------|----------|
| KKT24                               | 8496         | 277                | 50.5%    |
| KKT7                                | 1123         | 48                 | 32.8%    |
| KKT25                               | 881          | 28                 | 49.4%    |
| KKT8                                | 531          | 16                 | 29.1%    |
| KKT2                                | 420          | 14                 | 13.0%    |
| KKT1                                | 404          | 19                 | 20.6%    |
| KKT4                                | 387          | 8                  | 13.0%    |
| KKIP5                               | 386          | 11                 | 13.5%    |
| KKT14                               | 265          | 8                  | 13.3%    |
| KKT6                                | 181          | 6                  | 25.9%    |
| KKT9                                | 175          | 11                 | 37.1%    |
| KKT19                               | 145          | 4                  | 16.1%    |
| KKT5                                | 129          | 5                  | 25.4%    |
| KKT12                               | 123          | 3                  | 14.5%    |

**Figure 3. Identification of KKT25**

(a)

| Proteins co-purified with YFP-KKT2 | Mascot score | Number of peptides | Coverage | Proteins co-purified with YFP-KKIP1 | Mascot score | Number of peptides | Coverage |
|------------------------------------|--------------|--------------------|----------|-------------------------------------|--------------|--------------------|----------|
| KKT2                               | 1773         | 55                 | 46.0%    | KKT1                                | 4022         | 172                | 33.5%    |
| KKT1                               | 1023         | 31                 | 23.5%    | KKT7                                | 3824         | 176                | 78.9%    |
| KKT7                               | 701          | 22                 | 45.5%    | KKIP1                               | 3607         | 182                | 61.3%    |
| KKT8                               | 538          | 17                 | 59.6%    | KKT9                                | 2765         | 98                 | 75.1%    |
| KKT11                              | 302          | 8                  | 32.3%    | KKT8                                | 2216         | 81                 | 80.7%    |
| KKT10                              | 295          | 13                 | 27.7%    | KKT2                                | 1626         | 79                 | 48.1%    |
| KKT16                              | 291          | 4                  | 43.3%    | KKT4                                | 1529         | 58                 | 54.9%    |
| KKT9                               | 287          | 9                  | 32.2%    | KKT14                               | 710          | 28                 | 46.3%    |
| KKT6                               | 238          | 6                  | 28.3%    | KKT6                                | 641          | 24                 | 42.4%    |
| <b>KKIP1</b>                       | 219          | 6                  | 16.2%    | KKT11                               | 614          | 32                 | 62.9%    |
| KKT4                               | 173          | 3                  | 11.5%    | KKT10                               | 448          | 25                 | 33.5%    |
| KKT14                              | 156          | 3                  | 10.4%    | KKT19                               | 440          | 23                 | 35.7%    |
| KKT17                              | 138          | 4                  | 17.2%    | KKT5                                | 404          | 23                 | 40.4%    |
| KKT19                              | 129          | 8                  | 22.7%    | KKT15                               | 301          | 14                 | 33.4%    |
| KKT15                              | 127          | 2                  | 22.8%    | KKT3                                | 203          | 18                 | 17.9%    |

**Figure 4. KKIP1 co-purifies with KKT proteins, not with KKIP proteins**

(a)

| Proteins co-purified with YFP-KKIP2 | Mascot score | Number of peptides | Coverage | Proteins co-purified with YFP-KKIP3 | Mascot score | Number of peptides | Coverage |
|-------------------------------------|--------------|--------------------|----------|-------------------------------------|--------------|--------------------|----------|
| KKIP3                               | 5752         | 270                | 85.8%    | KKIP3                               | 3357         | 157                | 78.5%    |
| KKIP11                              | 3596         | 164                | 64.3%    | KKIP11                              | 3222         | 142                | 66.5%    |
| KKIP2                               | 2157         | 71                 | 30.0%    | KKIP2                               | 1571         | 44                 | 26.8%    |
| KKIP8                               | 1625         | 72                 | 40.5%    | <b>KKT1</b>                         | 880          | 27                 | 23.3%    |
| KKIP9                               | 460          | 14                 | 37.2%    | KKIP8                               | 855          | 37                 | 31.6%    |
| KKIP10                              | 258          | 12                 | 37.3%    | <b>KKT2</b>                         | 684          | 21                 | 30.2%    |
| KKIP4                               | 254          | 12                 | 38.0%    | <b>KKT7</b>                         | 615          | 34                 | 53.7%    |
| KKIP6                               | 204          | 4                  | 8.2%     | <b>KKT4</b>                         | 458          | 16                 | 40.8%    |
| KKIP12                              | 132          | 4                  | 42.8%    | KKIP9                               | 456          | 16                 | 34.5%    |
| Tb927.10.11600                      | 90           | 3                  | 12.4%    | KKIP4                               | 316          | 17                 | 35.7%    |
| Tb927.3.3740                        | 76           | 2                  | 10.0%    | KKIP10                              | 312          | 12                 | 32.4%    |
| <b>KKT1</b>                         | 71           | 5                  | 7.8%     | <b>KKT14</b>                        | 257          | 10                 | 20.0%    |
| <b>KKT7</b>                         | 62           | 3                  | 12.3%    | Tb927.10.11600                      | 231          | 8                  | 20.2%    |
|                                     |              |                    |          | KKIP6                               | 164          | 4                  | 15.1%    |
|                                     |              |                    |          | Tb927.3.3740                        | 164          | 7                  | 28.7%    |
|                                     |              |                    |          | <b>KKT6</b>                         | 152          | 3                  | 29.3%    |
|                                     |              |                    |          | Tb927.7.5590                        | 136          | 4                  | 11.6%    |
|                                     |              |                    |          | <b>KKT24</b>                        | 118          | 5                  | 13.2%    |
|                                     |              |                    |          | KKIP12                              | 118          | 2                  | 15.6%    |

(c)

| Proteins co-purified with YFP-KKIP4 | Mascot score | Number of peptides | Coverage |
|-------------------------------------|--------------|--------------------|----------|
| KKIP4                               | 9534         | 367                | 72.3%    |
| KKIP9                               | 8129         | 291                | 71.7%    |
| KKIP10                              | 6115         | 292                | 68.2%    |
| Tb927.3.3740                        | 5233         | 231                | 85.0%    |
| Tb927.10.11600                      | 4158         | 184                | 58.4%    |
| KKIP12                              | 4141         | 143                | 80.4%    |
| Tb927.7.5590                        | 3609         | 164                | 35.3%    |
| KKIP6                               | 3536         | 145                | 64.0%    |
| Tb927.11.7450                       | 2078         | 96                 | 55.4%    |
| Tb927.11.2900                       | 1596         | 45                 | 77.8%    |
| Tb927.2.3160                        | 757          | 29                 | 43.6%    |
| Tb927.8.7400                        | 592          | 30                 | 20.0%    |
| Tb927.10.170                        | 591          | 28                 | 47.3%    |
| Tb927.5.3250                        | 577          | 21                 | 18.1%    |
| Tb927.7.6320                        | 522          | 15                 | 20.8%    |
| KKIP11                              | 489          | 20                 | 26.1%    |
| KKIP8                               | 489          | 13                 | 20.9%    |
| KKIP3                               | 408          | 22                 | 40.9%    |
| Tb927.10.4740                       | 330          | 17                 | 87.3%    |

(d)

| Proteins co-purified with YFP-KKIP6 | Mascot score | Number of peptides | Coverage |
|-------------------------------------|--------------|--------------------|----------|
| KKIP9                               | 6003         | 172                | 76.7%    |
| KKIP4                               | 5933         | 218                | 76.0%    |
| KKIP10                              | 5825         | 216                | 65.3%    |
| KKIP12                              | 3551         | 85                 | 82.4%    |
| Tb927.7.5590                        | 2120         | 82                 | 30.5%    |
| Tb927.10.11600                      | 1941         | 77                 | 54.4%    |
| Tb927.3.3740                        | 1783         | 106                | 79.4%    |
| KKIP6                               | 1780         | 57                 | 55.6%    |
| Tb927.11.7450                       | 588          | 26                 | 30.1%    |
| Tb927.5.3250                        | 586          | 18                 | 20.7%    |
| Tb927.11.2900                       | 584          | 18                 | 60.8%    |
| Tb927.4.5020                        | 555          | 20                 | 16.5%    |
| Tb927.10.170                        | 529          | 19                 | 42.4%    |
| KKIP3                               | 497          | 23                 | 40.7%    |
| KKIP11                              | 483          | 20                 | 30.9%    |
| Tb927.10.4740                       | 310          | 14                 | 87.3%    |

(e)

| Name           | Annotation and domains                                                           |
|----------------|----------------------------------------------------------------------------------|
| Tb927.10.11600 | <b>putative splicing factor, arginine/serine-rich domain</b>                     |
| Tb927.3.3740   | <b>zinc-finger double-stranded RNA-binding</b>                                   |
| Tb927.7.5590   | domain of unknown function (DUF3883)                                             |
| Tb927.11.7450  | HIT zinc finger                                                                  |
| Tb927.11.2900  | HIT zinc finger                                                                  |
| Tb927.2.3160   | <b>H/ACA ribonucleoprotein complex subunit, Gar1/Naf1 RNA binding region</b>     |
| Tb927.10.4740  | <b>H/ACA ribonucleoprotein complex subunit Nop10</b>                             |
| Tb927.10.170   | <b>H/ACA ribonucleoprotein complex subunit Cbf5, tRNA pseudouridine synthase</b> |
| Tb927.5.3250   | <b>weak similarity to pre-mRNA-splicing factor 8</b>                             |
| Tb927.7.6320   | BTB/POZ domain, regulator of chromosome condensation (RCC1) repeat               |
| Tb927.8.7400   | <b>RNA polymerase IIA largest subunit</b>                                        |
| Tb927.4.5020   | <b>DNA-directed RNA polymerase II subunit RPB1</b>                               |
| KKIP2          | hypothetical protein                                                             |
| KKIP3          | putative PDZ domain                                                              |
| KKIP4          | <b>putative RNA recognition motif (RRM)</b>                                      |
| KKIP6          | <b>weak similarity to CTD kinase subunit gamma</b>                               |
| KKIP8          | <b>poly(A) polymerase</b>                                                        |
| KKIP9          | <b>putative RNA recognition motif (RRM)</b>                                      |
| KKIP10         | <b>putative RNA recognition motif (RRM)</b>                                      |
| KKIP11         | hypothetical protein                                                             |
| KKIP12         | <b>RBP34, RNA-binding protein, putative RNA recognition motif (RRM)</b>          |

**Figure 5. KOK subunits co-purify with a number of proteins with RNA-related functions**

## Supplemental Materials for

### Identification of four unconventional kinetoplastid kinetochore proteins KKT22–25

#### in *Trypanosoma brucei*

Olga O. Nerusheva, Patryk Ludzia, and Bungo Akiyoshi

### Supplemental Figures

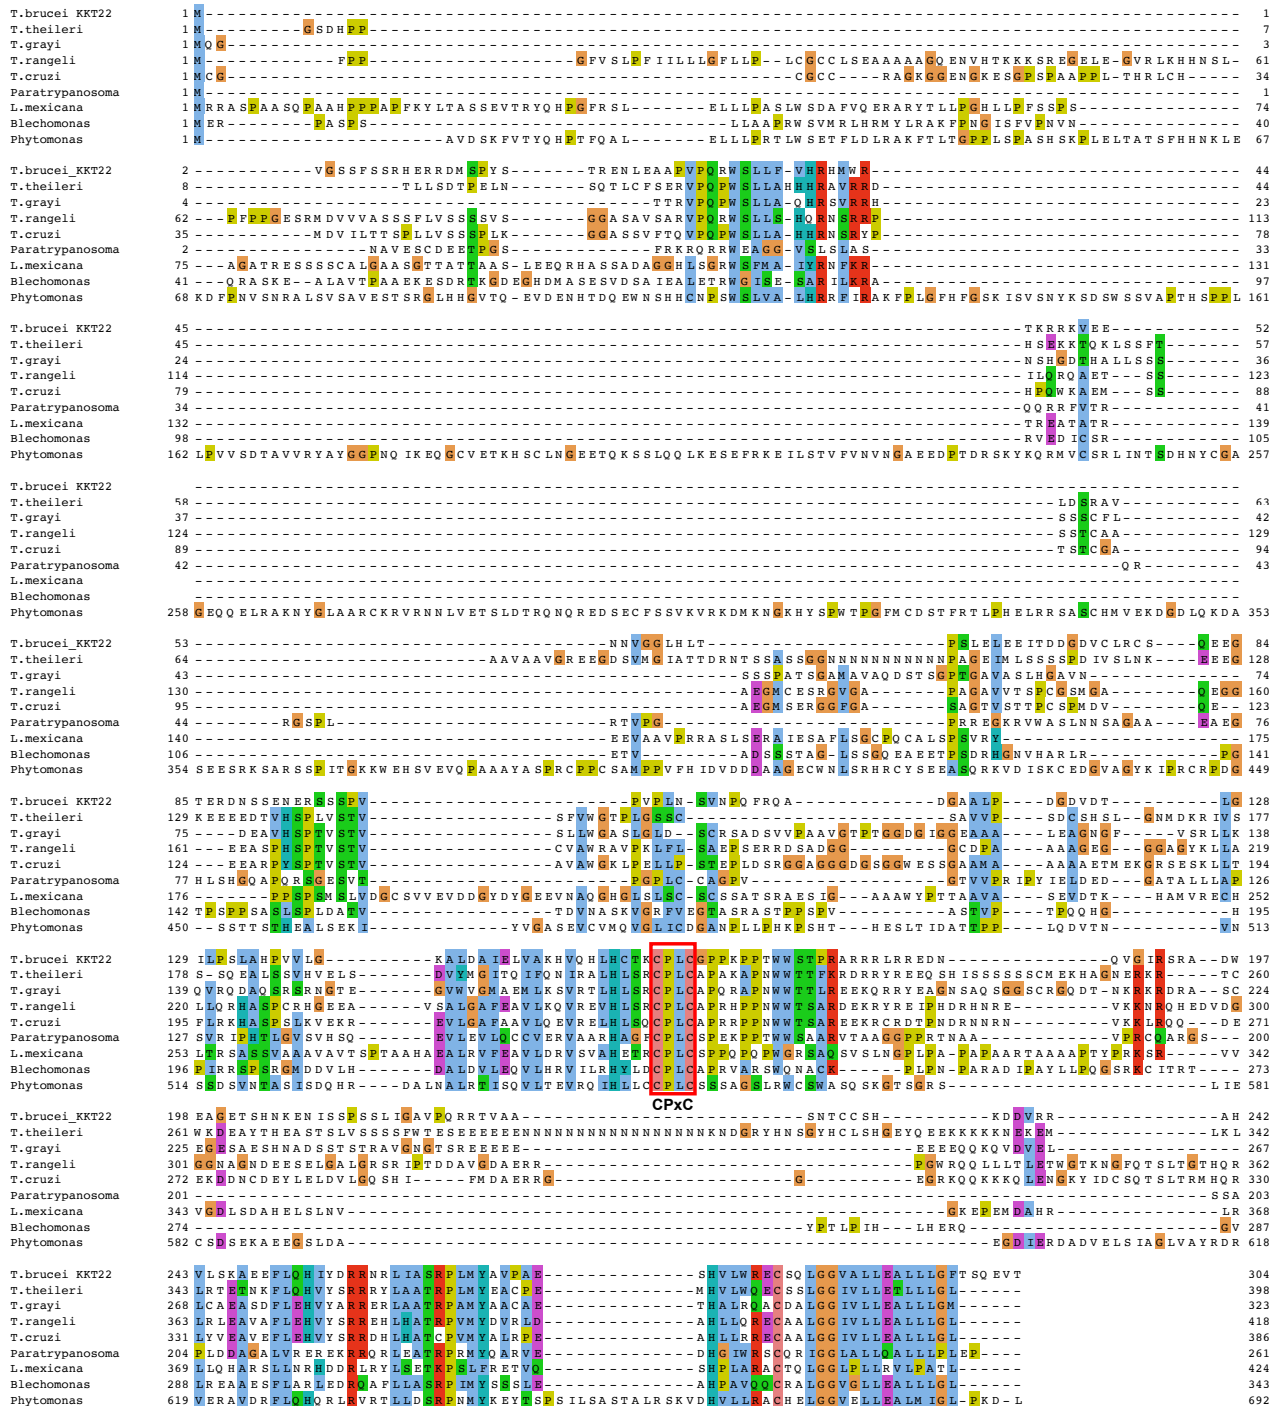

Figure S1. Multiple sequence alignment of KKT22

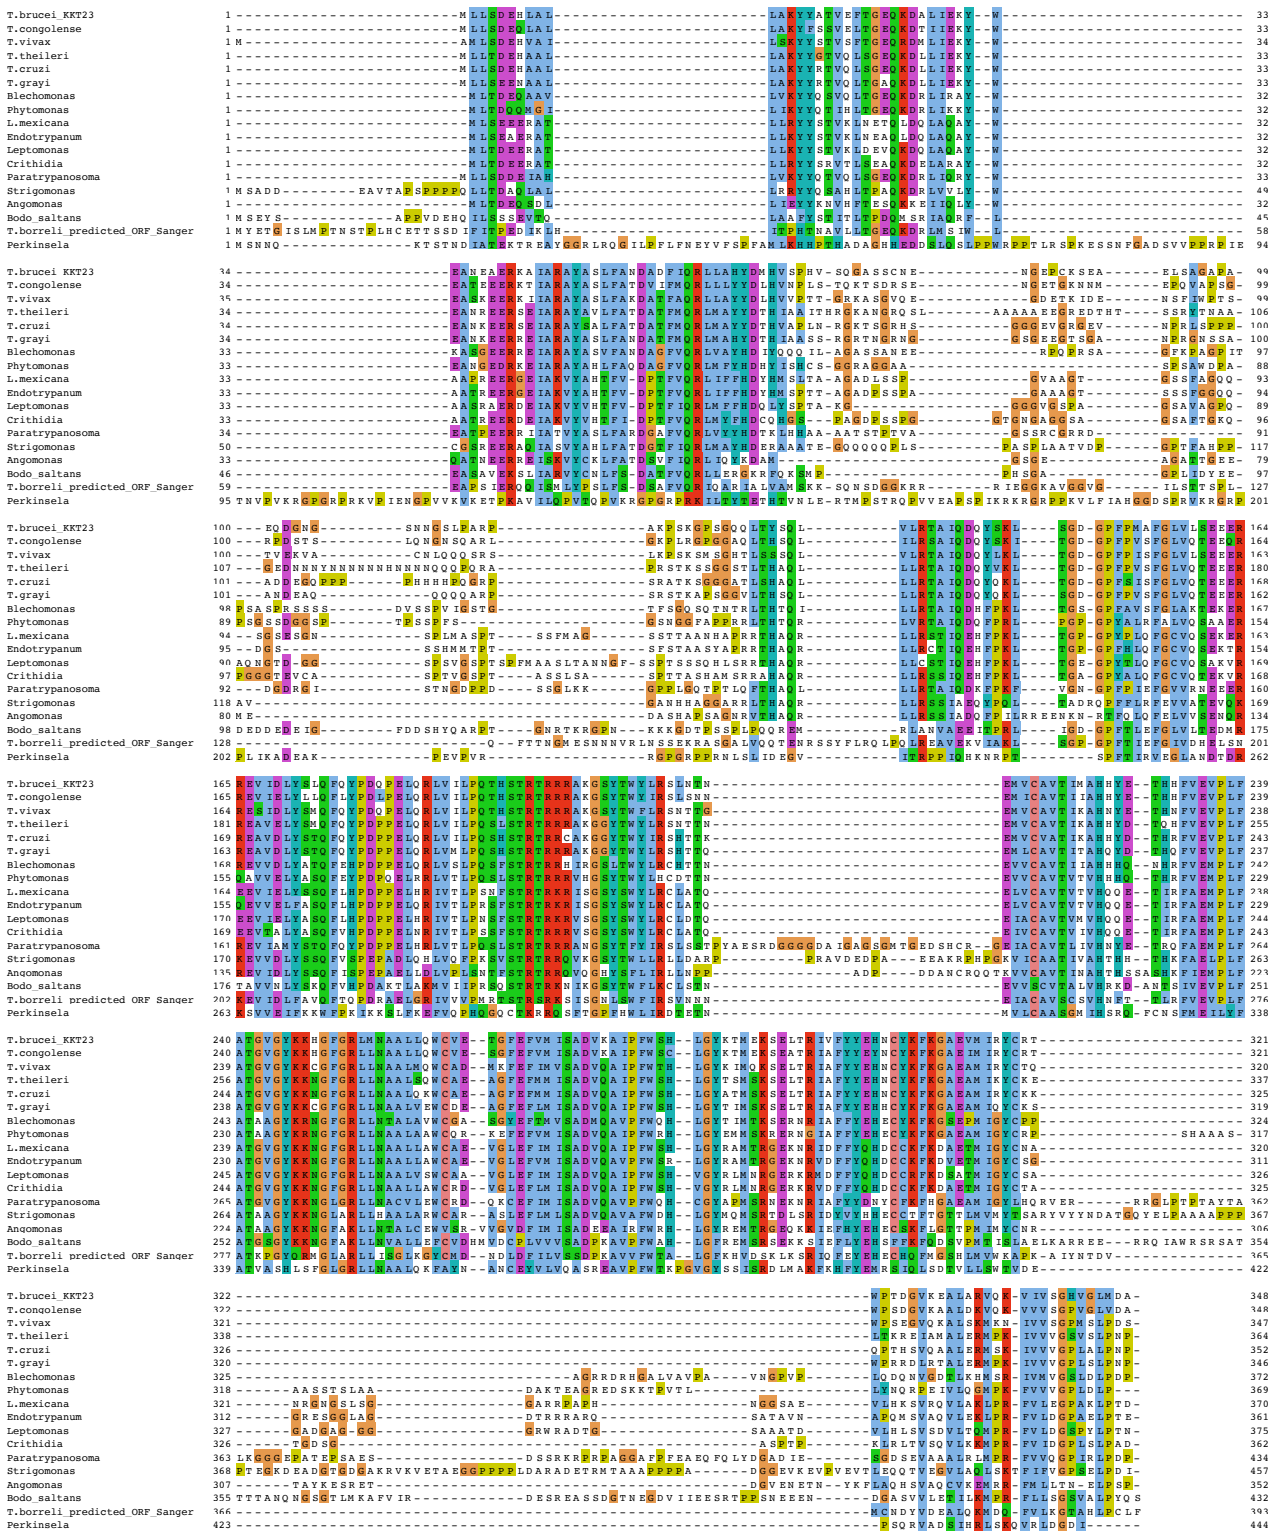

Figure S2. Multiple sequence alignment of KKT23

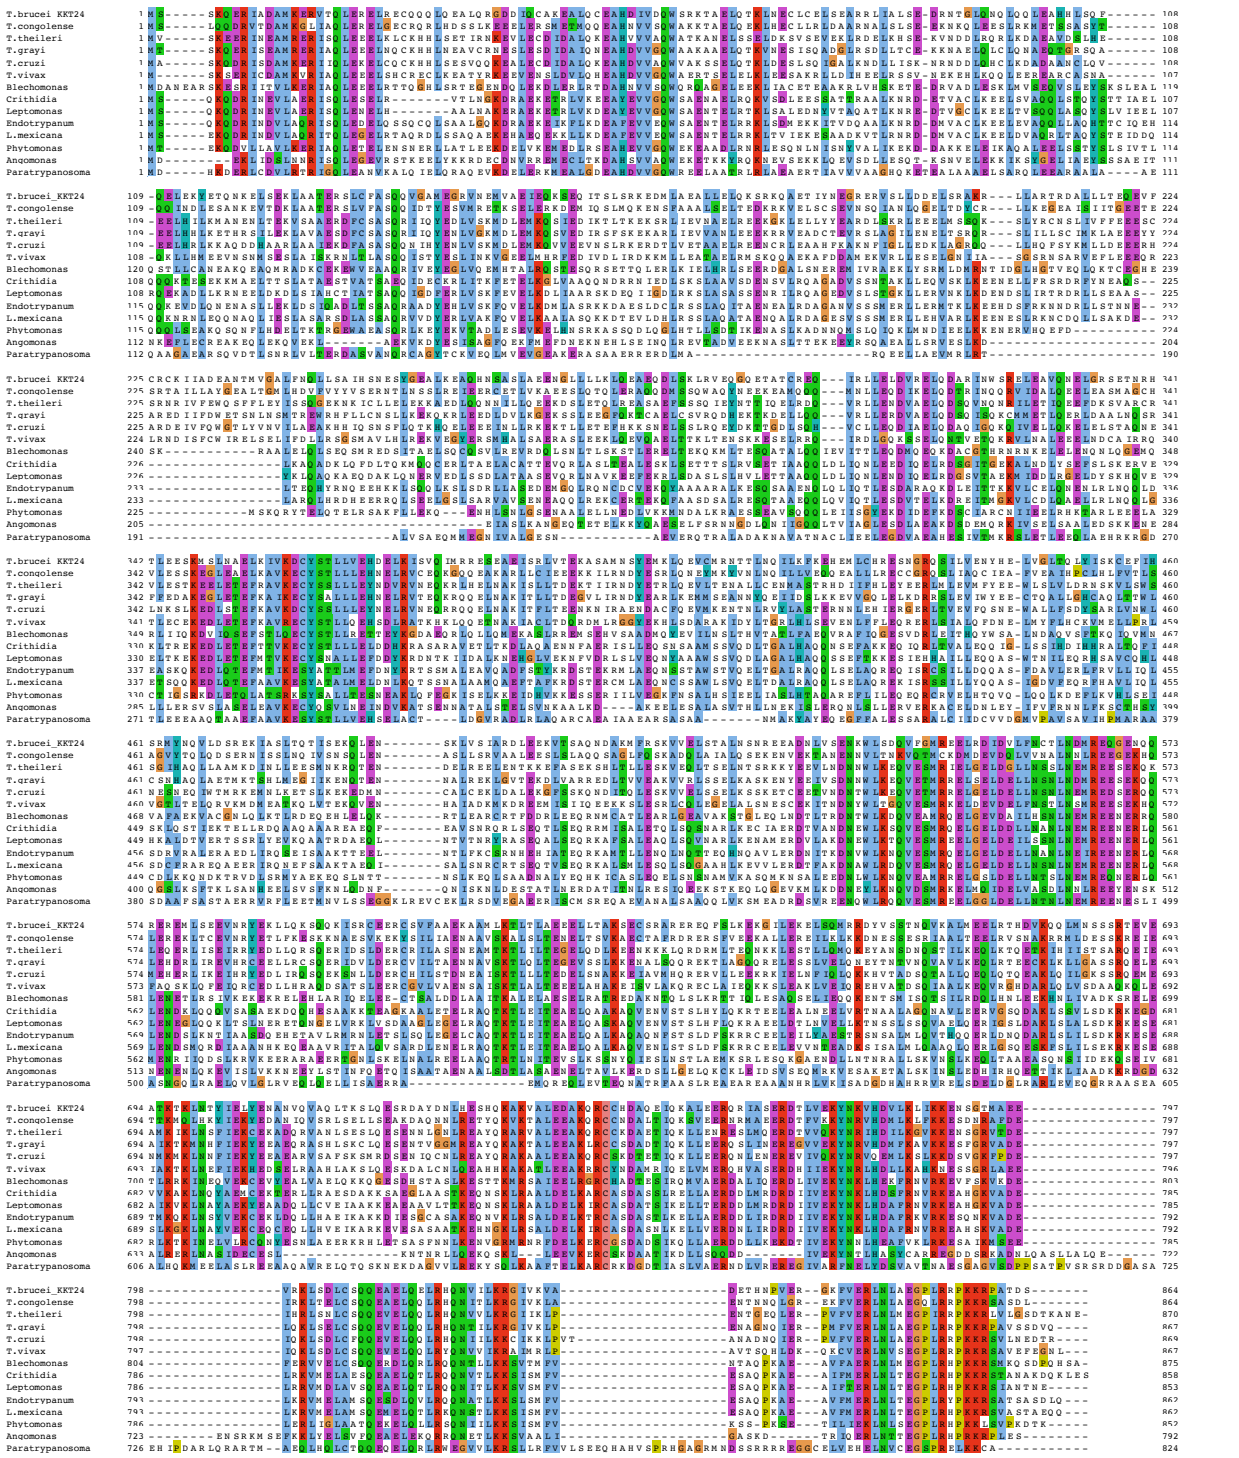

Figure S3. Multiple sequence alignment of KKT24 and its coiled-coil prediction

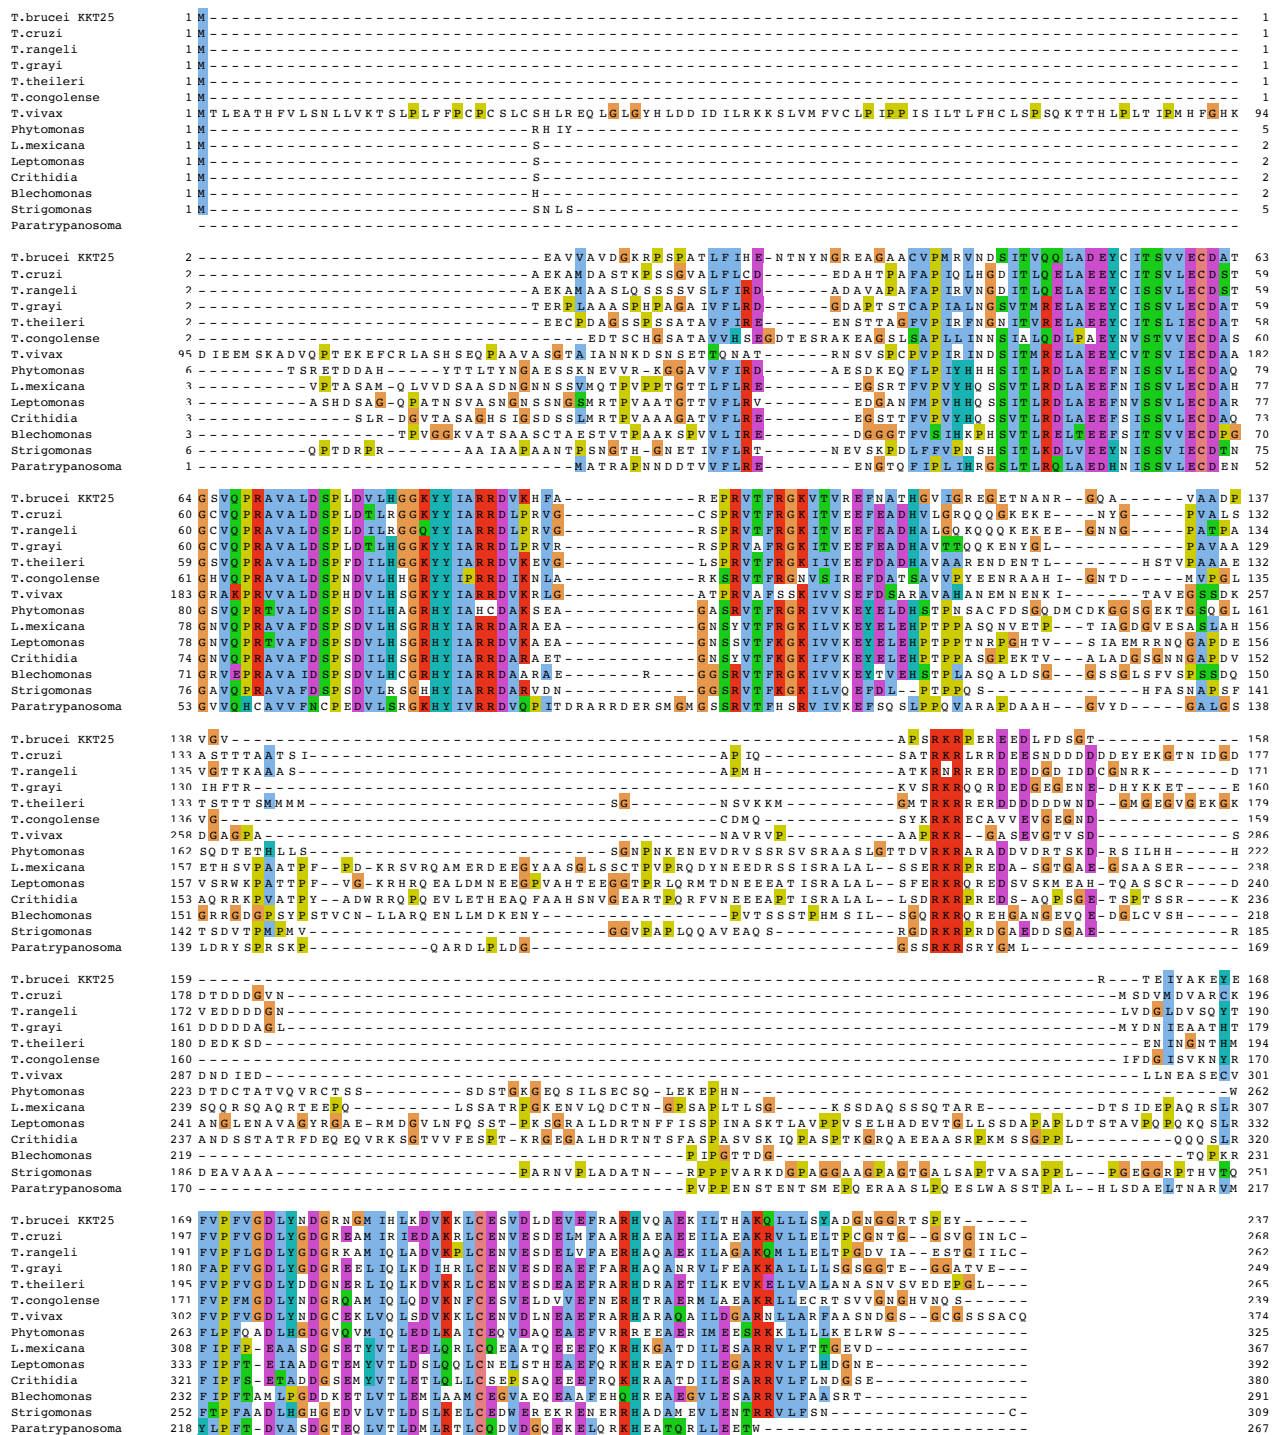

KKT25 N  237

Figure S4. Multiple sequence alignment of KKT25



## Supplemental Tables

**Table S1. Lists of all proteins identified in the immunoprecipitates of KKT22–25, KKT2, and KKIP1–7 by mass spectrometry (Excel file).**

**Table S2. Trypanosome cell lines used in this study.**

| Name    | Description                                                            |
|---------|------------------------------------------------------------------------|
| SmOxP9  | Parental cell line that expresses TetR and T7 RNAP (Poon et al., 2012) |
| BAP412  | heterozygous $\Delta$ kkk3 (this study)                                |
| BAP1123 | KKT3-YFP/ $\Delta$ kkk3 (this study)                                   |
| BAP567  | tdTomato-KKT2 (neomycin) (this study)                                  |
| BAP1490 | YFP-KKT22 (this study)                                                 |
| BAP1454 | YFP-KKT22, tdTomato-KKT2 (neomycin) (this study)                       |
| BAP1549 | YFP-KKT23 (this study)                                                 |
| BAP1593 | YFP-KKT23, tdTomato-KKT2 (blasticidin) (this study)                    |
| BAP1635 | YFP-KKT24 (this study)                                                 |
| BAP1819 | YFP-KKT24, tdTomato-KKT2 (blasticidin) (this study)                    |
| BAP1742 | YFP-KKT25 (this study)                                                 |
| BAP1820 | YFP-KKT25, tdTomato-KKT2 (blasticidin) (this study)                    |
| BAP710  | YFP-KKIP1 (Llauró et al., 2018)                                        |
| BAP825  | YFP-KKIP2 (this study)                                                 |
| BAP826  | YFP-KKIP3 (this study)                                                 |
| BAP808  | YFP-KKIP4 (this study)                                                 |
| BAP827  | YFP-KKIP5 (this study)                                                 |
| BAP828  | YFP-KKIP6 (this study)                                                 |
| BAP829  | YFP-KKIP7 (this study)                                                 |

**Table S3. Plasmids used in this study.**

| Name           | Description                                                                             |
|----------------|-----------------------------------------------------------------------------------------|
| pEnT5-Y        | TY-YFP tagging vector, Hygromycin (Kelly et al., 2007)                                  |
| pEnT6-tdTomato | TY-tdTomato tagging vector, Blasticidin (Kelly et al., 2007)                            |
| pPOTv7-eYFP    | Vector for PCR only tagging (POT) of target genes, Blasticidin (Dean et al., 2015)      |
| pBA183         | Neomycin gene cassette used for gene disruption (p2705 derivative) (Kelly et al., 2007) |
| pBA67          | TY-tdTomato-KKT2 tagging construct, Hygromycin (Akiyoshi and Gull, 2014)                |

|         |                                                                                |
|---------|--------------------------------------------------------------------------------|
| pBA164  | TY-tdTomato-KKT2 tagging construct, Blasticidin (Nerusheva and Akiyoshi, 2016) |
| pBA809  | TY-tdTomato-KKT2 tagging construct, Neomycin (this study)                      |
| pBA1715 | TY-YFP-KKT23 tagging construct, Hygromycin (this study)                        |
| pBA1803 | TY-YFP-KKT24 tagging construct, Hygromycin (this study)                        |
| pBA2004 | TY-YFP-KKT25 tagging construct, Hygromycin (this study)                        |
| pBA928  | TY-YFP-KKIP1 tagging construct, Hygromycin (Llauró et al., 2018)               |
| pBA1226 | TY-YFP-KKIP2 tagging construct, Hygromycin (this study)                        |
| pBA1227 | TY-YFP-KKIP3 tagging construct, Hygromycin (this study)                        |
| pBA1236 | TY-YFP-KKIP4 tagging construct, Hygromycin (this study)                        |
| pBA1228 | TY-YFP-KKIP5 tagging construct, Hygromycin (this study)                        |
| pBA1229 | TY-YFP-KKIP6 tagging construct, Hygromycin (this study)                        |
| pBA1230 | TY-YFP-KKIP7 tagging construct, Hygromycin (this study)                        |

**Table S4. Primers and synthetic DNA used in this study.**

| To make                   | Primer and synthetic DNA sequence (all are listed in the 5'-to-3' direction)                                                                                                                                                                                                                                                                                                                                                                                                                                                                                                                                                                                                                                                                                                                                                                                                                                                                                                                                                                                                                 |
|---------------------------|----------------------------------------------------------------------------------------------------------------------------------------------------------------------------------------------------------------------------------------------------------------------------------------------------------------------------------------------------------------------------------------------------------------------------------------------------------------------------------------------------------------------------------------------------------------------------------------------------------------------------------------------------------------------------------------------------------------------------------------------------------------------------------------------------------------------------------------------------------------------------------------------------------------------------------------------------------------------------------------------------------------------------------------------------------------------------------------------|
| BAP412                    | <p>SmOxP9 was transfected with a fusion PCR product consisting of:</p> <ol style="list-style-type: none"> <li>1. Upstream targeting sequence proximal to KKT3, amplified from genomic DNA using primers BA909 and BA911,</li> <li>2. Neomycin gene cassette amplified from pBA183 using primers BA903 and BA904, and</li> <li>3. Downstream targeting sequence distal to KKT3, amplified from genomic DNA using primers BA914 and BA915. Clones were screened by PCR as follows</li> </ol> <p>BA941 and BA943: 1.4 kb in strains if carrying the deletion<br/>           BA942 and BA943: 0.9 kb in strains if carrying the deletion</p> <p>BA909: GTGATGGTGTTCATATATATAT<br/>           BA911: TGGGAACCTTAGTCAACCTCCTCGACTTTAGGGCGCTTACTGGTAATATATAA<br/>           BA903: CCTAAAGTCGAGGAGGTTGA<br/>           BA904: CTCGATAAAATAAATAGAAGTGC<br/>           BA914: CAACAAAGCACTTCTATTTATTTATCGAGCATGCCTGTTTGTGCAGCTT<br/>           BA915: GTACCAAAGTGAAAAAAG</p> <p>BA941: TGCTGAAGCATCCGCTGATA<br/>           BA942: CCACCTATCTGCTGAAGTTG<br/>           BA943: GTCGGTCTTGACAAAAAGAA</p> |
| BAP1123                   | <p>PCR-based C-terminal YFP tagging of KKT3 using pPOTv7 (eYFP, blasticidin) on BAP412</p> <p>BA1821:<br/>           GTAATGGAGTTTGTGAGGTGCTTGATGAGGAAAAATTCCCCTTTCGGAGGAACTCAACCAGATGCTCTACGGTG<br/>           GCGTGGGTTCTGGTAGTGGTTCC<br/>           BA1822:<br/>           GAAATGCGACAGCAGACGGAACGGAATAAAAAAAAAAAGAGAGGGCTATCTGTAATTCTTTACGTAC<br/>           ATCACTTCCAATTTGAGAGACCTGTGC</p>                                                                                                                                                                                                                                                                                                                                                                                                                                                                                                                                                                                                                                                                                              |
| BAP1454<br>and<br>BAP1490 | <p>PCR-based N-terminal YFP tagging of KKT22 using pPOTv7 (eYFP, blasticidin) on BAP567 (for BAP1454) or SmOxP9 (for BAP1490)</p> <p>BA2129:<br/>           TTGCCAATTCACATTCGTGCATTTGGTGTTCCTCTTTTTAACTAGACACATCACACCCAGGCAACAGCCTAAA<br/>           AAGAGTATAATGCAGACCTGCTGC<br/>           BA2130:<br/>           GCGGCCTCAAATTTCCCGTGTACTATAAGGGGACATATCTCGCCTTTCGTGCCGTGAGGAAAAGCTGGAGCCT<br/>           ACCATACTACCCGATCCTGATCC</p>                                                                                                                                                                                                                                                                                                                                                                                                                                                                                                                                                                                                                                                     |
| pBA1715                   | Synthetic DNA for the N-terminal tagging target sequence for KKT23 with XbaI and BamHI, cloned into pEnT5-Y                                                                                                                                                                                                                                                                                                                                                                                                                                                                                                                                                                                                                                                                                                                                                                                                                                                                                                                                                                                  |

GATCGATCGATCTCTAGAGGAGCAGGTTTACTTAGTGATGAGCACCTGGCATTGCTGGCGAAGTACTACGCCAC  
GGTAGAGTTACAGGTGAACAGAAGGACGCGCTCATAGAAAAACTGGGAGGCAAATGAAGCTGAGCGCAA  
GGCCATCGCGAGGGCTACGCATCGCTCTTTGCCAATGACGCCGACTTCATTACAGCGACTGCTTGCCACTACG  
ATATGCATGTTAGCCCGCATGTGAGTCAGGGTGGCAGCAGTTGCAATGAGAACGGCGGCCGATCGACCACCC  
ATCAATGCTTTGTACAAGAAGAGCATCTTTCCCTTTCTTTTTTGTCCGACTCGGAAGGTGAAAGAAGATTGAAA  
AGAGACAATATTGACAGCCATAGAGGGCTTGACGCTGGGATAGTGTGCGCACTGGGGGTGTACAAGTGGGTA  
CGCAAAAAAATATTCCCTCCCTCGAAATTTGTTTCTGGCGTTTTCTGTCACGCCTTTTTTTTTTTGATTTGAG  
GGTGTGTGCATACGGATCCGATCGATCGATC

pBA1803 Synthetic DNA for the N-terminal tagging target sequence for KKT24 with XbaI and BamHI, cloned into pEnT5-Y

GATCGATCGATCTCTAGAGGAGCAGGTTTATCCAAGCAGGAGAGAATAGCCGATGCTATGAAGGAGCGCGTAC  
CCAATAAGAAAGGAATTGAGGGAATGCCAGCAGCTACAGGAGGCTTGCAAAGAGGTGATGATATACAG  
TGCGCAAGGAAGCGTTACAGTGCAGAACCCATGATATTGTGGATCAGTGGTCTAGGCGGCCGCCGAATTGTTG  
TTTTTATCACTCACCTAATGTGGCATGGGAGTAATTCACATGATGTGACCCTACAAGGCGATCAAGATCTTTAC  
AATAATAGCAATAATAATAATAGATTGTATGTGCCGTTATACTGTCATCCCTATCTCATTATCAACCGGTCTGTG  
TTGATGTATGGTACAACGAACCTCGGAAGTTCCCTATAGTTAACTACCCTTGGCATTGATATCCTCATCTTAT  
TCTGCTTAGTCCGATCCGATCGATCGATC

pBA2004 Synthetic DNA for the N-terminal tagging target sequence for KKT25 with XbaI and BamHI, cloned into pEnT5-Y

GATCGATCGATCTCTAGAGGAGCAGGTGAGGCTGTGGTTCGACAGTGGATGGCAAACGTCACGCCCGCGACTTT  
GTTTATTGATAAAACACTAATAATGGAAGGGAAGCGGGTGGCGGTGCGTTCCATCGGAGTCAACGATA  
GCATTACTGTGCAACAACCTCGCTGATGACTGCATCACAGTGTGTGGAATGTGATGCCACGGGTAGTGTTC  
AACCCCGAGCGGTGGCGCTAGATTCACCCCTTGTGTTCTCCACGGGGGAAAAGTATTATATTGCCAGGCGTGATG  
TGAAACATTTTGGCGGGGAACCCCGGTAACATTCCTGGAAGGTTACCGTGGAGGGAGTTAATGCGACACAC  
GGGGTAATTTGGCGGGGAAGGGGAAAACAACCGCAACCGGAGGACAAGCTGTCGCTGCGGATCCCGTAGGCGTAG  
CCCCATCCCGCAAGCGGCCCAACGGGAGGAAGACTTGTTCGATAGCGGCACACGCACTGAGATATATGCGAAG  
GAGTACGAATTTGTGCCCTTCGTGGGGATCTTACAACGATGGAAGGAATGGCATGATTCATCTCAAAGATGTG  
AAGAACTCTGTGAAAGCGTAGATTTAGACGAAGTTGAGTTCAGAGCGCGACACGTACAAGCGGAGAAAATCCT  
AACCCATGCAAAACAACCTATTGCTTAGCTACGCGGACGGCAACGGCGGGAGGACCAGCCCGAATACCGCGCCG  
CGGCGTGGAGTGAAGTGCCTATTGTGTGGTTGATCTTTGAGACGGAGTGTACAGTTTCTTTAAGGGGGGAAA  
TGCTTGGTCTTATTATTATATCCACTCGTTTAAACGTCCTCCGATAACCGCAATGCGCCGCTTGGCGGGCAC  
ACCGCCGACACAAAACAGGTGAGAAGACTCCCATATCATTCTGATTTCTTCTAGCTTTGGACTCAGTTACCTTA  
AGGAAGGAAGGGCAAGGGAACGTGGATCCGATCGATCGATC

pBA1226 Synthetic DNA for the N-terminal tagging target sequence for KKIP2 with XbaI and BamHI, cloned into pEnT5-Y

GATCGATCGATCTCTAGAGGAGCAGGTCCGAATTCGGCACCGATGAAAACAATACCGCCGAAGTCGCGTGTTC  
CCCCGATTGGATTACCCCGGCTGCATCGCCAGTGGCAGAGACGTGATAAATTGAGGACTCCACACGAATTGC  
GACTTGAGGAATTAGATGTTCAACGAACGGAGATGGAGGAAGCGAGCCGCCGATTATGAGCATTGTCTCAGAG  
AAGAAGAGCGCACTTGAGAAAGTTGGATCGTCAACGAGAGAAAGGCAAAGGCAAGCGCCGATATATGATATCT  
ATATTTGTGTATACGTTGAGGGTGAACCTCAATCAATGTGTACAATTTTTTCTTTTCTATTGCCCTTTTTTTCTTAT  
TTGTGCGTTTCCACCCTACTAGTCGGTTCAATCCGAACCCGACCGCCTCTTTTTCCCTTCTATCATTATCATTAC  
ATCACTGCTTCGCACTTTATAACCGTCGTTGTTGGTTGCTTATTGCTGCTTGTGTCGCTGATCCGTTACGTGCT  
TGAGGGATCCGATCGATCGATC

pBA1227 Synthetic DNA for the N-terminal tagging target sequence for KKIP3 with XbaI and BamHI, cloned into pEnT5-Y

GATCGATCGATCTCTAGAGGAGCAGGTGCTGGTGGCGGAACAACGACAATTTACAGCGTAGAGGAAGTTAGCGT  
AGAGTTAGGTCGCGCATCACTGCATGCTTCTTGGGTTTCAAGACATATGACGGTGTCTGCCCCCTTCGTGTACGT  
GATGTAGCAGCGGAGATTCTGTAAGGTGTAAGGCGCGGTGATGAAATAATTGTAATTAACCGAATCCGACCAGG  
GAGCTATGATGAGGGAATGTCATTGCTGCATCAGGCGCAGTCAACCGTTCGCGGCCGACGTGGAGCCCGTACG  
CCAAGGAGGTAACCAAAAAGAGGGGAAAATAACGAAGAGCAGGGACAGCAAGAACACGTTTGGGATTTCG  
AGGAATAAGTTCAATTTGGTGTGCGCTACGTTTGTATCGTTTACGAAGGGTAGAAAAAAGTTCGTAGTAACGACCG  
TACAACAAAAGGTAGCTGGGAAAAAATTGATTGAGTGACACGATTTGTCATTGCGGCGGAAAACATTAATTCG  
ATCGGCCACGAGGGATCCGATCGATCGATC

pBA1236 Following two PCR fragments were cloned into pEnT5-Y using XbaI and BamHI

- KKIP4 CDS targeting sequence with XbaI and NotI  
BA1700: GATCGATCTCTAGAGGAGCAGGTTGGAACGCATTTAGCGG  
BA1701: GATCGATCGCGGCCGCTCATCGATATTAGGCTGG  
- KKIP4 5'UTR targeting sequence with NotI and BamHI  
BA1702: GATCGATCGCGGCCGATGAAGTGTCTCTTGTCTAC  
BA1703: GATCGATCGGATCCCTATCGCAGCGAAGAAAAG

pBA1228 Synthetic DNA for the N-terminal tagging target sequence for KKIP5 with XbaI and BamHI, cloned into pEnT5-Y

GATCGATCGATCTCTAGAGGAGCAGGTGACAGTGATACCATTTATTGTGATGAAAGCTCCGTAGCGAGTCTTTCA  
CAGCTCAAGGCGTCCCGCTTACGACTCGATTCCCTCCCCCTACACCAATGGTCTTAACGCCATGTGACTCC  
AAGCTCAGCGCATCCGCCAGGAAAAATCAACTAAAGCAGCAACGGCACCGGACCGGTCATCATTGTCATGCAC  
GGCGTAACATCACCTTCACTTTCGAGTCCGACTTCATACCTGAGACTCGCGGCCGCGCACACCCGCGCATAC  
ATCCCTCGGTTCTATACTCTACTTGTGCATCGTCAAGTGAAGGAGGCACTTGTTTATAACATATATATATATA

TATATATTATACGTTGCCGCTCACTTCCATTTTTCGGTTCATCGTCATTCATTTCGCTTGAGCGAGCGGTTGTG  
CTCACACAATAAAAATCAACAACAGTGTGTACTGAGGAGAAACGAAGGGAAGGGGCATCGGTGGCAACAGCG  
CATTGACAGGATCCGATCGATCGATC

pBA1229 Synthetic DNA for the N-terminal tagging target sequence for KKIP6 with XbaI and BamHI, cloned into pEnT5-Y

GATCGATCGATCCTAGAGGAGCAGGTTCAACAGAGGAACTCGTGCAGCGGGTGTACAAATGCAAATGACGAG  
TCCTCATTTGCGGAATATTGCGTTGCTCACGTCACAGATTCCAAACATAAGTTTTTATTCGATGCAACAGATAGT  
GAAGAGAGGGCAGCTTACTGCGCGCTTCTCAGAGGATGAGGGGGGATTATTAGTGACGAGTCGAGGGAATG  
TGCGGGAGCGACGGCGGCAGGAACGGAGCGTCAGCGGCAGCGGCATCGGCGCGGCCGCAACATTTAAGGT  
GAAGATTTTGTGTTTTTTTTTTGATTGTTTACATTCAAATTATAATTAGTTTCACATTTATTCATTTAAAGTGT  
TGAATTAATCGGGTGCATAGGGTATTACACACGGGAGCAAACGCATTACGGTGAATTGCTTAACGTGTTTGA  
ACTTTTGCTCTGACGAGAGTTCGGATAAGAAGTTGTGTTGTGGATTAGGACGGACAGACAAGAAAAA  
AGAAAATTGGATCCGATCGATCGATC

pBA1230 Synthetic DNA for the N-terminal tagging target sequence for KKIP7 with XbaI and BamHI, cloned into pEnT5-Y

GATCGATCGATCCTAGAGGAGCAGGTTTCATCGTCAGAAGCGGTGAAGGCGCTGCATCCCTGACGAAGGAAGA  
GCTCATGCAGCGCGTGTAGAGCTGCAAGGGAAGAATGCGGAGTTGTACGACGAGGTAGAACAGTTGCGGCAGC  
GCCTCTCGAAAACAGGATTCCGGACGTCAGCAACCCTCGTGTTCGATTCGCCATTCGTGTGATGTCGGTTCGTG  
TTCGCCACGAGGTTACGACGCTGGCAAGTACGCTGGGGGGACAATACGGCGCGCGCTCTCTTCGCCTGTT  
GTGTGCTTTTACTCTACCCCATTTCTTCGCAAGCACTAGTTAACTATTTTTTTTCTTTTTCACGTCT  
CTGGGGACGGCAGGGACGTTTTGTGCGTTGCTGTGATTGAGTCTTAACACAGAGACCAAGAAAAGAGGGACAA  
TAGCCGCAATCTATACAGTATTTGTTGCCAGATACGAGCGAGGGCCGGGAGAATATACATACTGGCATATAGG  
CGGAGCGGGATCCGATCGATCGATC

---

## Supplemental References

- Akiyoshi, B., and K. Gull. 2014. Discovery of unconventional kinetochores in kinetoplastids. *Cell*. 156:1247–1258. doi:10.1016/j.cell.2014.01.049.
- Dean, S., J. Sunter, R.J. Wheeler, I. Hodgkinson, E. Gluenz, and K. Gull. 2015. A toolkit enabling efficient, scalable and reproducible gene tagging in trypanosomatids. *Open Biol.* 5:140197. doi:10.1098/rsob.140197.
- Kelly, S., J. Reed, S. Kramer, L. Ellis, H. Webb, J. Sunter, J. Salje, N. Marinsek, K. Gull, B. Wickstead, and M. Carrington. 2007. Functional genomics in *Trypanosoma brucei*: a collection of vectors for the expression of tagged proteins from endogenous and ectopic gene loci. *Mol. Biochem. Parasitol.* 154:103–109. doi:10.1016/j.molbiopara.2007.03.012.
- Llauró, A., H. Hayashi, M.E. Bailey, A. Wilson, P. Ludzia, C.L. Asbury, and B. Akiyoshi. 2018. The kinetoplastid kinetochore protein KKT4 is an unconventional microtubule tip-coupling protein. *J. Cell Biol.* 217:3886–3900. doi:10.1083/jcb.201711181.
- Nerusheva, O.O., and B. Akiyoshi. 2016. Divergent polo box domains underpin the unique kinetoplastid kinetochore. *Open Biol.* 6:150206. doi:10.1098/rsob.150206.
- Poon, S.K., L. Peacock, W. Gibson, K. Gull, and S. Kelly. 2012. A modular and optimized single marker system for generating *Trypanosoma brucei* cell lines expressing T7 RNA polymerase and the tetracycline repressor. *Open Biol.* 2:110037. doi:10.1098/rsob.110037.
